# Supplementary material for: Density functional theory study on organically surface-modified silicene
Source: Royal Society of Chemistry journal article supplement (doi:10.1039/c5ra05751e), 2015-01-01
Supplement: c5ra05751e1.pdf [file c5ra05751e1.pdf]

## **Supporting Information for**

# **Density Functional Theory Study on Organically Surface-Modified Silicene**

*Rong Wang,<sup>1,2</sup> Xiaodong Pi,<sup>1\*</sup> Zhenyi Ni,<sup>1</sup> Yong Liu<sup>1</sup> and Deren Yang<sup>1</sup>*

<sup>1</sup>State Key Laboratory of Silicon Materials and Department of Materials Science and Engineering, Zhejiang University, Hangzhou 310027, China

<sup>2</sup> Key Laboratory of Interface Science and Engineering in Advanced Materials, Ministry of Education, Taiyuan University of Technology, Taiyuan 030024, China

Email: [xdpi@zju.edu.cn](mailto:xdpi@zju.edu.cn)

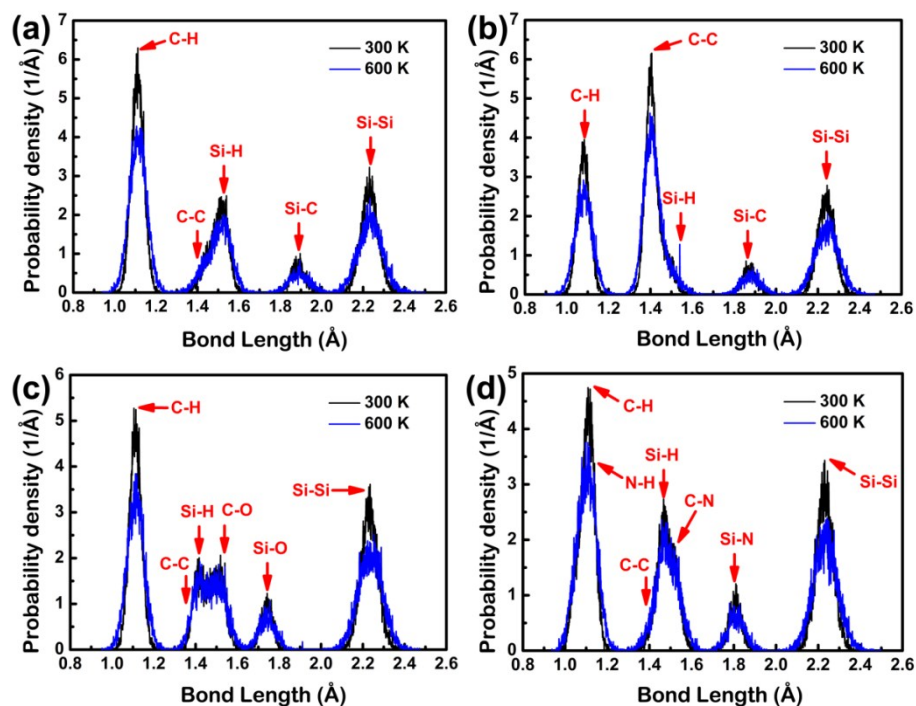

**Fig. S1.** Bond distributions of (a) hydrosilylated silicene, (b) phenylated silicene, (c) alkoxyated silicene and (d) aminated silicene at 300 and 600 K after 2000 ps of molecular dynamics.

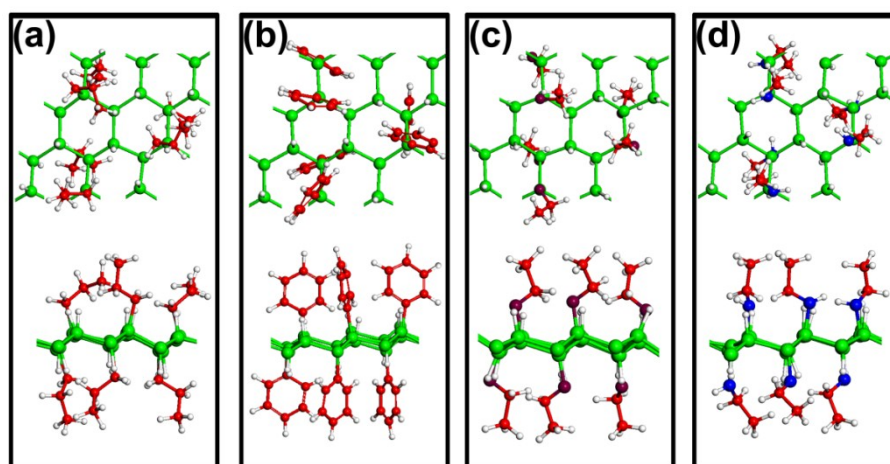

**Fig. S2.** Structures of (a) hydrosilylated silicene, (b) phenylated silicene, (c) alkoxyated silicene and (d) aminated silicene at 600 K after 2000 ps of molecular dynamics. Both top and side views of each structure are shown. Si, H, C, O and N atoms are denoted by green, white, red, purple and blue balls, respectively.

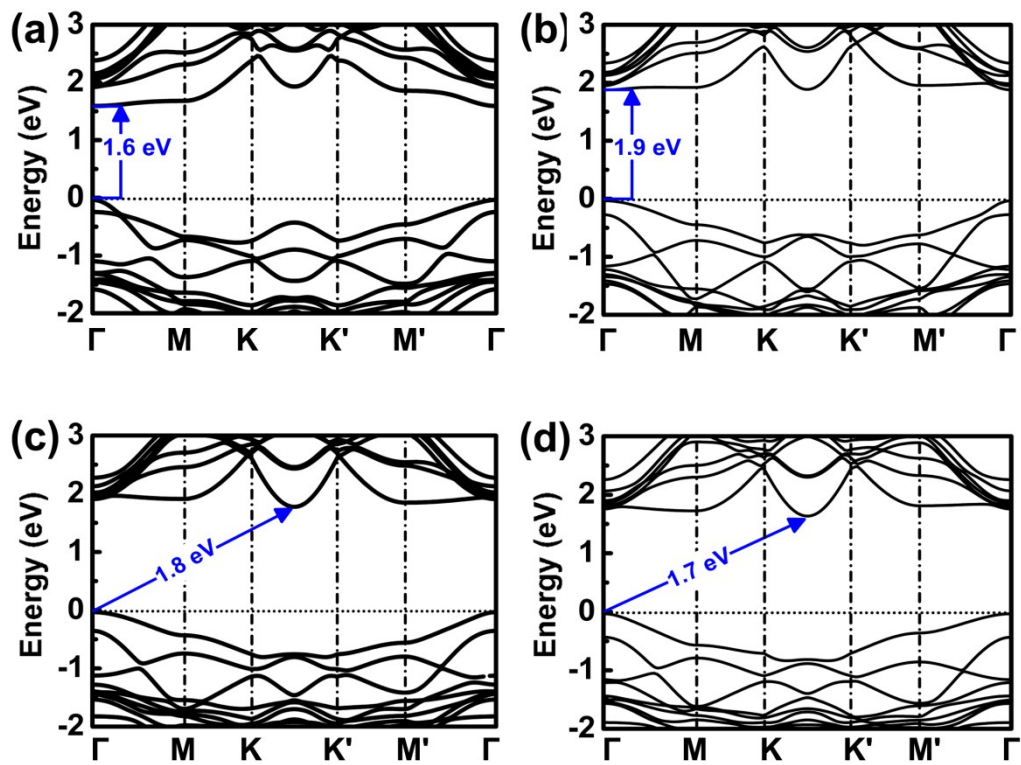

**Fig. S3.** Band structures of propylene-hydrosilylated silicene with the surface coverages of (a) 5%, (b) 11%, (c) 33% and (d) 44%. Energy is shifted so that the Fermi level is at 0 eV.
